# Supplementary material
Source: PubMed Central journal article supplement (PMC3808159)
Supplement: NIHMS494725-supplement-01.pdf [file NIHMS494725-supplement-01.pdf]

**Supplemental Material**

*In utero* arsenic exposure and infant infection in a United States cohort: A prospective study and systematic review

Shohreh F. Farzan, Susan Korrick, Zhigang Li, Richard Enelow, A. Jay Gandolfi, Juliette Madan, Kari Nadeau, Margaret R. Karagas

**Table of Contents**

**Page(s)**

Supplemental Table 1. Published epidemiological studies of arsenic exposure with immune function and infection outcomes in children.....2,3

| Table S1. Published epidemiological studies of arsenic exposure with immune function and infection outcomes in children. |                            |                                               |                                                       |                          |                                                              |                                                                                                                                                                                                                                                                                                                                                                                                                                             |                                                                                                   |                                                                                                                                                                                                                                                                                                                                                   |
|--------------------------------------------------------------------------------------------------------------------------|----------------------------|-----------------------------------------------|-------------------------------------------------------|--------------------------|--------------------------------------------------------------|---------------------------------------------------------------------------------------------------------------------------------------------------------------------------------------------------------------------------------------------------------------------------------------------------------------------------------------------------------------------------------------------------------------------------------------------|---------------------------------------------------------------------------------------------------|---------------------------------------------------------------------------------------------------------------------------------------------------------------------------------------------------------------------------------------------------------------------------------------------------------------------------------------------------|
|                                                                                                                          | Author                     | Population/<br>Study Group                    | Study Design                                          | Sample<br>Size           | Exposure<br>Assessm<br>ent                                   | Exposure Level                                                                                                                                                                                                                                                                                                                                                                                                                              | Outcomes                                                                                          | Findings                                                                                                                                                                                                                                                                                                                                          |
| Immune function outcomes at the molecular and cellular levels                                                            | Soto-Pena, et al., 2006    | Zimapan, Hidalgo, Mexico                      | Cross-sectional (6-10yrs, randomly selected)          | N=90                     | Urine As                                                     | Low: <50µg/L<br>High: ≥50µg/L<br><br>(86% in ≥50µg/L group)                                                                                                                                                                                                                                                                                                                                                                                 | T-cell proliferation, cytokine production, PBMC subpopulation levels                              | Increased [UA] correlated with decreased T-cell populations, IL-2 levels, proliferative response, and IFNγ secretion and increased GM-CSF secretion in response to LPS stimulation                                                                                                                                                                |
|                                                                                                                          | Fry, et al., 2007          | Bangkok and Ron Pibul Districts, Thailand     | Prospective birth cohort (enrolled during pregnancy)  | N=32                     | Maternal toenail As                                          | Unexposed: <50µg/g toenail<br>Exposed: ≥50µg/g toenail<br><br>Range: 0.1-68.63µg/g toenail                                                                                                                                                                                                                                                                                                                                                  | Whole genome microarray analysis of infant cord blood, transcription factor binding site analysis | 447 genes were differentially expressed between infants of exposed and unexposed mothers; identified a highly predictive 11 gene signature that correlates with As exposure and 3 As-transcriptionally regulated sub-networks that control inflammation (IL-1β/ NFκB), stress responses (HIF-1α/STAT1, IL-8), and the cell cycle (EGR1, FOS, JUN) |
|                                                                                                                          | Luna, et al., 2010         | Zimapan, Hidalgo, Mexico                      | Cross-sectional (6-10yrs, randomly selected)          | N=87                     | Urine As                                                     | Mean: 194.6 µg/g creatinine<br>Range: 12.3-1411 µg/g creatinine                                                                                                                                                                                                                                                                                                                                                                             | Nitric oxide/ oxygen superoxide anion determination, and hemoglobin quantification in PBMCs       | As exposure increased basal levels of nitric oxide and oxygen superoxide anion in PBMCs and monocytes and levels of oxygen superoxide anion in activated monocytes, indicative of oxidative stress                                                                                                                                                |
|                                                                                                                          | Rocha-Amador, et al., 2011 | Durango (D) and San Luis Potosí (SLP), Mexico | Cross-sectional (6-10yrs, randomly selected children) | N=40 (20 per study area) | Urine As<br>Urine F<br>Drinking water As<br>Drinking water F | SLP Mean: 14.2 µg/g creatinine<br>SLP Range: 4.2-42.9 µg/g<br>D Mean: 46.3 µg/g<br>D Range: 9.98-101.7 µg/g<br><br>SLP Mean: 1.94 µg/g creatinine<br>SLP Range: 0.9-4.9 µg/g<br>D Mean: 5.7 µg/g<br>D Range: 1.9-15.6 µg/g<br><br>SLP Mean: 6.7 µg/L<br>SLP Range: 4.75-8.8 µg/L<br>D Mean: 157.9 µg/L<br>D Range: 0.98-245.1 µg/L<br><br>SLP Mean: 0.67 ug/L<br>SLP Range: 0.34-1.01 ug/L<br>D Mean: 8.19 ug/L<br>D Range: 1.35-11.10 µg/L | Proportion of apoptotic PBMCs                                                                     | Higher levels of PBMC apoptosis were detected in children of Durango that were exposed to both As and F; both As and F were individually correlated with increased PBMC apoptosis                                                                                                                                                                 |

**Table S1. Published Epidemiological Studies of Arsenic Exposure with Immune Function and Infection Outcomes in Children (con't).**

| Infection and clinical outcomes |                      |                                               |                                               |                              |                                                        |                                                                                                                                                          |                                                                                                                                                                                                                                                                                                                                                                                       |                                                                                                                                                                                                                                                                   |
|---------------------------------|----------------------|-----------------------------------------------|-----------------------------------------------|------------------------------|--------------------------------------------------------|----------------------------------------------------------------------------------------------------------------------------------------------------------|---------------------------------------------------------------------------------------------------------------------------------------------------------------------------------------------------------------------------------------------------------------------------------------------------------------------------------------------------------------------------------------|-------------------------------------------------------------------------------------------------------------------------------------------------------------------------------------------------------------------------------------------------------------------|
| Infection and clinical outcomes | Raqib, et al., 2009  | Matlab, Bangladesh                            | Prospective birth cohort (enrolled at GW6-10) | N=140                        | Maternal urine As, GW 6-10                             | Mean: 68.5 µg/L<br>Range: 1-2020 µg/L                                                                                                                    | Birth weight and height, infant TI, IL-7 and Ltf in breast milk, maternal and infant morbidity                                                                                                                                                                                                                                                                                        | [UA] was negatively correlated with levels of IL-7 and lactoferrin in breast milk and positively associated with both fever and diarrhea during pregnancy and ARI in male infants; In utero As exposure impaired infant thymic development and enhanced morbidity |
|                                 |                      |                                               |                                               |                              | Maternal urine As, GW 30                               | Mean: 64.7 µg/L<br>Range: 4-1126 µg/L                                                                                                                    |                                                                                                                                                                                                                                                                                                                                                                                       |                                                                                                                                                                                                                                                                   |
|                                 | Moore, et al., 2009  | Matlab, Bangladesh                            | Prospective birth cohort (enrolled at GW8)    | N=2094                       | Mean maternal urine As, GW8 and GW 30                  | Mean: 102 µg/L<br>Range: 5.5-1150 µg/L                                                                                                                   | Infant TI measured at weeks 0, 8, 24 and 52                                                                                                                                                                                                                                                                                                                                           | TI was negatively associated with maternal arsenic exposure during pregnancy. Infant TI was positively associated with infant weight and month of measurement.                                                                                                    |
|                                 | Rahman, et al., 2011 | Matlab, Bangladesh                            | Prospective birth cohort (enrolled at GW8)    | N= 1552                      | Maternal urine As, GW8                                 | Mean: 152 µg/L<br>Range: 1-1211 µg/L                                                                                                                     | Infant LRTI, infant diarrhea                                                                                                                                                                                                                                                                                                                                                          | Infants born to mothers with high [UA] had an elevated risk of LRTI, severe LRTI and diarrhea, relative to those with lower exposure levels; As exposure during pregnancy is associated with significantly increased morbidity.                                   |
|                                 |                      |                                               |                                               |                              | Maternal urine As, GW 30                               | Mean: 166 µg/L<br>Range: 2-1440 µg/L                                                                                                                     |                                                                                                                                                                                                                                                                                                                                                                                       |                                                                                                                                                                                                                                                                   |
| Ahmed, et al., 2011             | Matlab, Bangladesh   | Prospective birth cohort (enrolled at GW8)    | N=130                                         | Maternal urine As, GW8       | Mean: 136 µg/L<br>SD: 167 µg/L                         | Immune and inflammatory markers in cord blood and placental tissue                                                                                       | As exposure increased placental inflammatory markers, likely by increasing oxidative stress; As exposure decreases placental T-cells and alters cytokine profile                                                                                                                                                                                                                      |                                                                                                                                                                                                                                                                   |
|                                 |                      |                                               |                                               | Maternal urine As, GW 30     | Mean: 143 µg/L<br>SD: 164 µg/L                         |                                                                                                                                                          |                                                                                                                                                                                                                                                                                                                                                                                       |                                                                                                                                                                                                                                                                   |
| Ahmed, et al., 2012             | Matlab, Bangladesh   | Prospective birth cohort (enrolled at GW6-13) | N=130                                         | Maternal urine As, GW8 or 14 | Median: 69 µg/L<br>5-95 percentiles: 19-441 µg/L       | Infant TI and thymic function assessed by sjTREC quantification, oxidative stress, apoptotic and inflammatory markers in cord blood and placental tissue | Maternal arsenic exposure reduced the levels of sjTRECs in cord blood CD4+ and CD8+ cells, a measure of thymic function and lymphocyte maturation. High levels of As exposure were related to differential regulation of multiple oxidative stress and apoptosis related genes in cord blood, as increases in oxidative stress markers 8-oxoG and 8-OHdG, in placenta and cord blood. |                                                                                                                                                                                                                                                                   |
|                                 |                      |                                               |                                               | Maternal urine As, GW 30     | Median: 85 µg/L<br>5-95 percentiles: 20-508 µg/L       |                                                                                                                                                          |                                                                                                                                                                                                                                                                                                                                                                                       |                                                                                                                                                                                                                                                                   |
|                                 |                      |                                               |                                               | Maternal blood As, GW 14     | Median: 4.7 µg/kg<br>5-95 percentiles: 1.4- 22.2 µg/kg |                                                                                                                                                          |                                                                                                                                                                                                                                                                                                                                                                                       |                                                                                                                                                                                                                                                                   |

GW: gestational week, UA: urinary arsenic, PBMCs: peripheral blood mononuclear cells, TI: thymic index, ARI: acute respiratory infection, LRTI: lower respiratory tract infection, sjTREC: signal-joint T cell receptor excision circles, Ltf: lactoferrin.
